# Supplementary material
Source: PubMed Central journal article supplement (PMC7384427)
Supplement: mmc1.pdf [file mmc1.pdf]

**Table 1. Referral Diagnoses (n=312)**

| <u>Referral Diagnosis</u>    | <u>n (%)</u> | <u>Referral Diagnosis (cont.)</u>       | <u>n (%)</u> |
|------------------------------|--------------|-----------------------------------------|--------------|
| Ruptured Globe               | 35 (11.2)    | Episcleritis/Scleritis                  | 5 (1.6)      |
| Retinal Detachment           | 30 (9.6)     | Retinal Artery Occlusion                | 5 (1.6)      |
| Corneal Ulcer                | 25 (8.0)     | Orbital Mass                            | 4 (1.3)      |
| Acute Angle Closure Glaucoma | 21 (6.7)     | Conjunctivitis                          | 4 (1.3)      |
| Optic Nerve Edema            | 19 (6.1)     | Retinal Tear                            | 4 (1.3)      |
| Eyelid Laceration            | 18 (5.8)     | Blurred Vision                          | 3 (1.0)      |
| Corneal Foreign Body         | 15 (4.8)     | Posterior Uveitis                       | 3 (1.0)      |
| Vitreous Hemorrhage          | 15 (4.8)     | Giant Cell Arteritis                    | 3 (1.0)      |
| Ocular Hypertension          | 15 (4.8)     | Non-arteritic Ischemic Optic Neuropathy | 2 (0.6)      |
| Preseptal/Orbital Cellulitis | 10 (3.2)     | Neovascular Glaucoma                    | 2 (0.6)      |
| Chemical/Thermal Burn        | 10 (3.2)     | Visual Field Defect                     | 2 (0.6)      |
| Corneal Abrasion             | 9 (2.9)      | Dislocated Lens                         | 1 (0.3)      |
| Hyphema                      | 8 (2.6)      | Diabetic Retinopathy                    | 1 (0.3)      |
| Optic Neuritis               | 8 (2.6)      | Posterior Vitreous Detachment           | 1 (0.3)      |
| Endophthalmitis              | 7 (2.2)      | Anisocoria                              | 1 (0.3)      |
| Anterior Uveitis             | 6 (1.9)      | Optic Neuropathy                        | 1 (0.3)      |
| Cranial Nerve Palsy          | 6 (1.9)      | Horner's Syndrome                       | 1 (0.3)      |
| Herpes Zoster Ophthalmicus   | 5 (1.6)      | Unexplained vision loss                 | 1 (0.3)      |
| Orbital Fracture             | 5 (1.6)      | Unexplained eye pain                    | 1 (0.3)      |
