# Supplementary material
Source: PubMed Central journal article supplement (PMC7384427)
Supplement: mmc2.pdf [file mmc2.pdf]

**Table 2. "Can't Miss Diagnoses" (n=57)**

| <u>Referral Diagnosis</u>     | <u>n (%)</u> |
|-------------------------------|--------------|
| Ruptured Globe                | 29 (50.9)    |
| Endophthalmitis               | 9 (15.8)     |
| Giant Cell Arteritis          | 5 (8.8)      |
| Acute Angle Closure Glaucoma  | 4 (7.0)      |
| Cerebrovascular Accident      | 4 (7.0)      |
| Central Nervous System Lesion | 2 (3.5)      |
| Third Nerve Palsy             | 2 (3.5)      |
| Orbital Compartment Syndrome  | 1 (1.8)      |
| Acute Horner's Syndrome       | 1 (1.8)      |
