# Supplementary material
Source: PubMed Central journal article supplement (PMC7384427)

**Figure 2. Proportion of Accurate Diagnoses Made by Referring Providers by Diagnosis Location**  
**[Correct Diagnoses by Eye Specialists] (Correct Diagnoses by Non-Eye Specialist)**

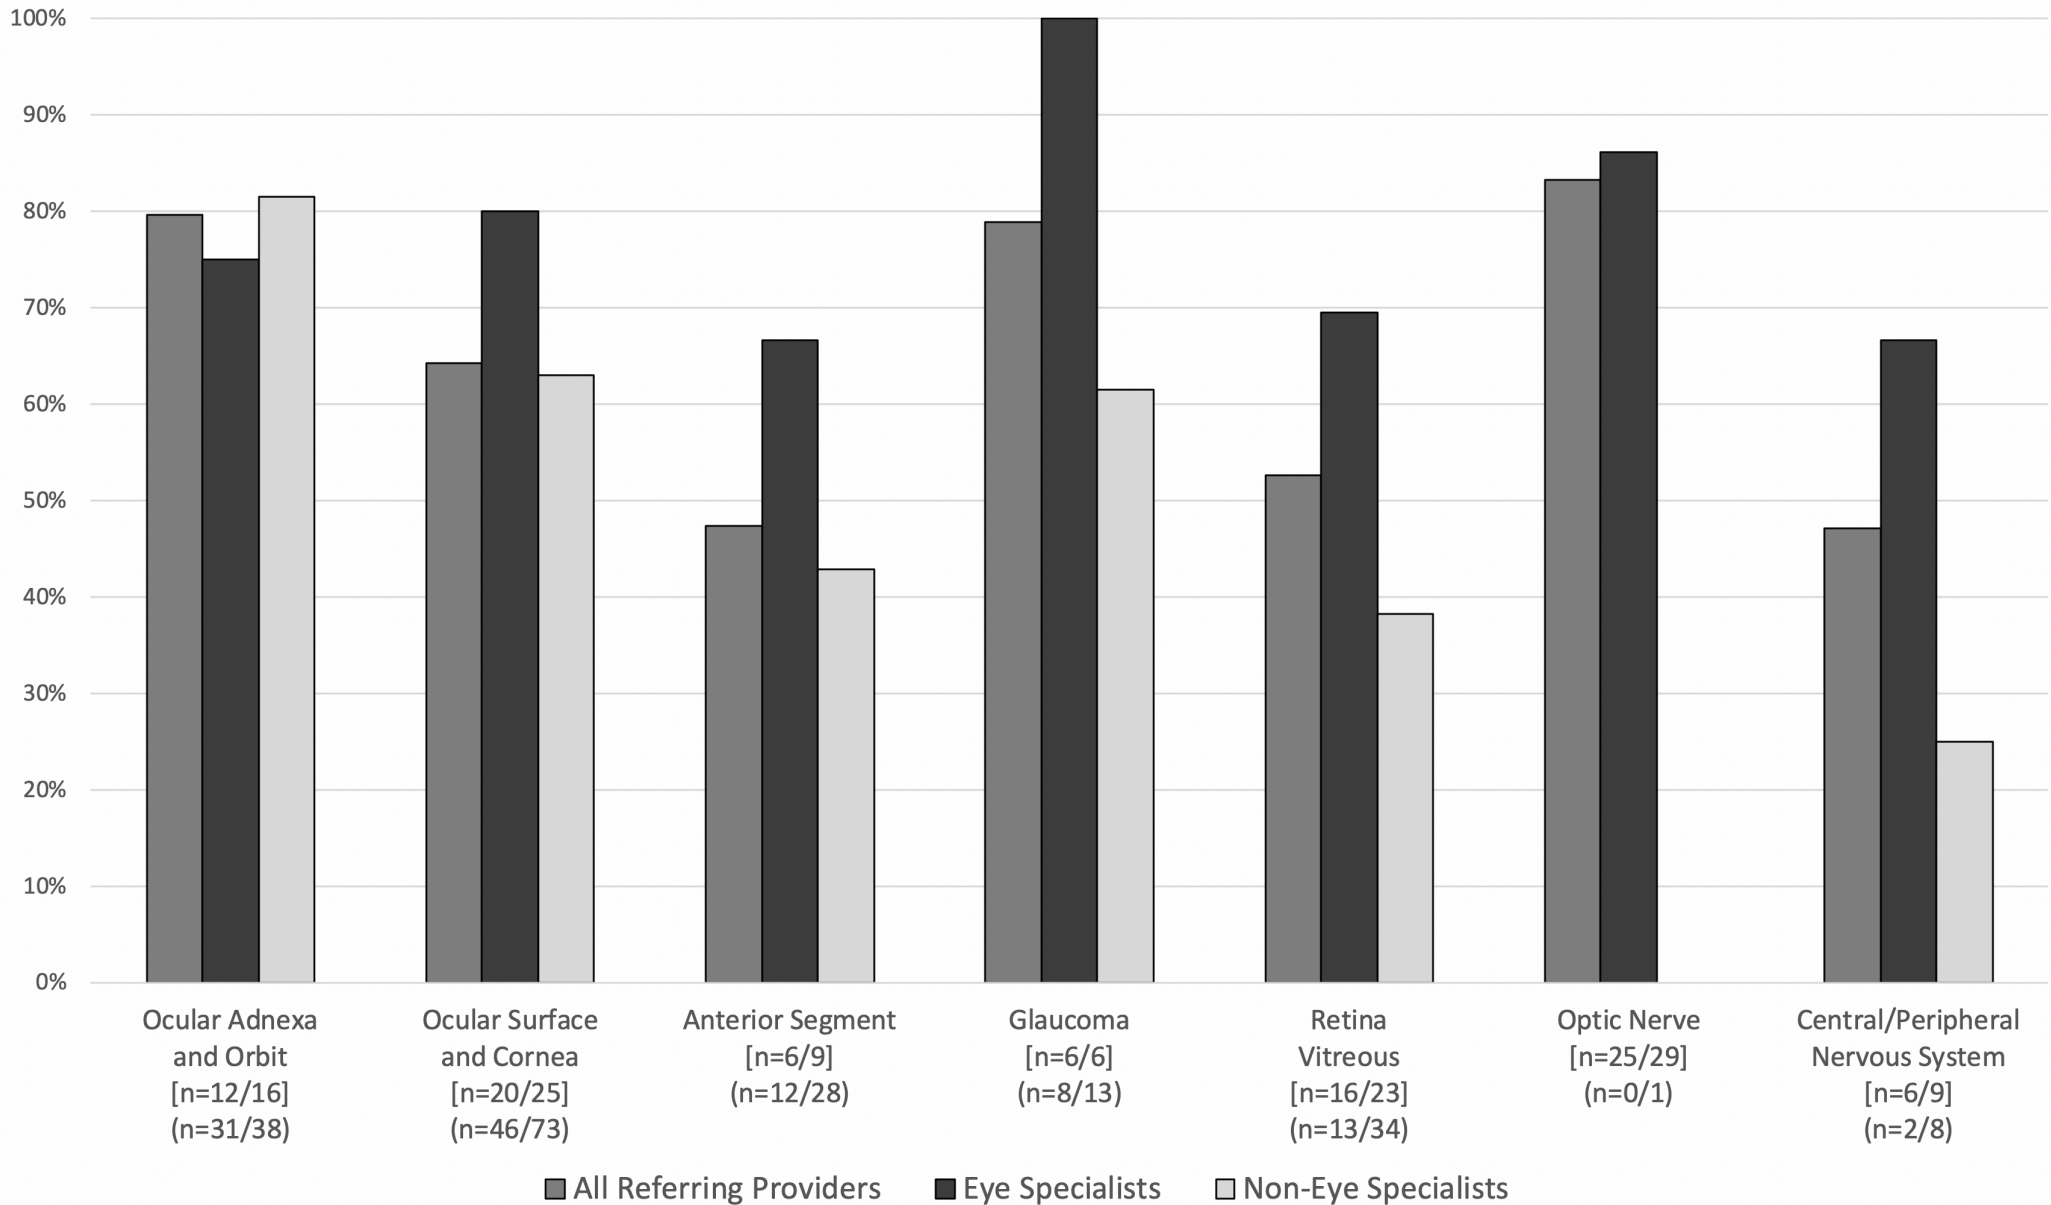

Supplement: mmc3.pdf [file mmc3.pdf]
